# Supplementary material
Source: PubMed Central journal article supplement (PMC3789382)

## Supplemental Materials

### Supplemental Figures

**Figure S1. Phospho-tyrosine Western blot profiles from Figure 2 analyzed by GeneTools (Syngene) Software, related to Figure 2** A. Translocated TEM<sup>pos</sup>Ly6G<sup>+</sup> PMNs or non-translocated TEM<sup>neg</sup>Ly6G<sup>+</sup> PMNs isolated from spleens of mice infected with WT-E TEM or  $\Delta yopH$ -E TEM for 5 days. (B) Magnification of (A). (C) BPPMNs infected with WT,  $\Delta yopH$  or uninfected at MOI 10:1 for 30 min. Software scans each individual lane (higher to lower molecular weight) and assigns Rf values to each detected band and represents them as histogram plots (Profile heights vs Rf values). Each peak represents a band and the level of phosphorylation is represented as the area under that peak. Lanes can be compared by overlapping them.

**Figure S2. Model of SLP-76 mediated immuno-receptor and integrin signaling, related to Figure 3.** (1) Immuno-receptor ligation initiates activation of Src family kinases (SFK) that phosphorylates ITAMs present on the receptor chains. (2) Syk is recruited, activated, and phosphorylates LAT and SLP-76. Phosphorylated LAT associates with phospho lipase gamma (PLC $\gamma$ ) and Gads and in doing so, recruits SLP-76 to the membrane. (3) Phosphorylated SLP-76 associates with Vav1, Nck, and Itk, which together activate PLC $\gamma$  and initiate Ca<sup>+2</sup> flux and actin polymerization. (4) Association of SLP-76 with the ADAP/SKAP55/RIAM complex promotes inside-out signaling by localizing active Rap1. (5) Integrin-mediated signaling events that occur downstream of ligand binding requires structural changes and activation of Src family kinases that phosphorylates a variety of downstream molecules. These include

ITAM-containing adapters that, when phosphorylated, lead to the recruitment and activation of Syk kinase. (6) Syk in turn phosphorylates various substrates, including SLP76 and Vav. (7) SFKs can also activate FAK (focal adhesion kinases) such as paxillin. Figure S2 related to Figures 3, 4 and 5.

**Figure S3. Levels of known YopH targets in different cell lines, related to Figure 4.**

J774 macrophages, BMPMNs, HEp2 (human epithelium cells), Jurkat T cells and mouse embryonic fibroblast (MEF) cells were lysed and 10µg of protein/lane were loaded into a SDS-PAGE gel and analyzed by Western blot for the presence of some of the known YopH targets.

**Figure S4. Calcium flux inhibition prevents IL-10 production in neutrophils and IL-10 production is inhibited by YopH from extracellular *Yptb*, related to Figure 6.**

(A-B) Groups of five mice were infected IV with either WT-E TEM or  $\Delta yopH$ -E TEM. Five days p.i, spleens were collected and TEM<sup>pos</sup> Gr1<sup>+</sup>CD11b<sup>+</sup> and TEM<sup>neg</sup> Gr1<sup>+</sup>CD11b<sup>+</sup> cells (both neutrophils and iMo) were sorted and lysed. IL-10 (A) and TNF- $\alpha$  (B) were isolated from clarified supernatants using the BD<sup>TM</sup> Cytometric Bead Array following manufacturer's instructions and analyzed by FACS. The average and STD from 5 experiments are shown. Statistical significance was calculated by one-way ANOVA followed by Tukey's multiple comparison post-test. (C-D) Single cell suspensions of spleens from mice intravenously infected for 4 days with 1,000 CFUs of WT-E TEM, 10,000 CFUs of  $\Delta yopH$ -E TEM or 5,000 CFUs of  $\Delta yopE$ -E TEM were assayed for the presence of intracellular bacteria using a gentamicin protection assay – spleen

cells were assayed for total CFU (C) and with gentamicin treatment (D). (E-F) Single cell suspensions of spleens from mice intravenously infected for 5 days with 1,000 CFUs of WT-E TEM were plated for total CFU (E). Splenocytes were then incubated with 1 µg/ml CCF4-AM (Invitrogen), 1.5mM probenecid (Sigma) and 100 µg/ml gentamicin. TEM<sup>pos</sup> and TEM<sup>neg</sup> cells were sorted, collected, lysed and plated for CFUs and the number of gentamicin-resistant bacteria per 100,000 TEM<sup>pos</sup> or TEM<sup>neg</sup> cells was determined (F). (G-H) BMPMNs (8x10<sup>4</sup> cells/well) were treated with 50µM APB, or 5µM EGTA for 30 min before BMPMNs were infected with Δ5+pBAD, Δ5+pYopH or Δ5+pYopE at MOI 10:1 for 4hours, then 100µg/ml gentamicin was added and supernatant collected 12 hours later. Supernatants were collected and IL-10 concentrations (G) and LDH released (H) were determined. Three independent experiments were performed in triplicate. The average +/- STD of one representative experiment is shown. Statistical significance was calculated using one-way ANOVA followed by Tukey's multiple comparison post test.

**Supplemental Table 1\*. *Yersinia* strains used in this study related to Figures 1-6.**

| Strains                      |                                                                                          |                         |
|------------------------------|------------------------------------------------------------------------------------------|-------------------------|
| <i>Y. pseudotuberculosis</i> | IP2666c pBI <sup>+</sup> <i>yopH</i> (NdeI)                                              | (Ivanov et al., 2005)   |
| IP2666 ETEM                  | Amino acids 1-100 of YopE+TEM1                                                           | (Harmon et al., 2010)   |
| IP2666 Δ <i>yopH</i> -ETEM   | Deletion of <i>yopH</i> +Amino acids 1-100 of YopE+TEM1                                  | This work               |
| IP2666 Δ <i>yopE</i> -ETEM   | Deletion of <i>yopE</i> +Amino acids 1-100 of YopE+TEM1                                  | Cynthia Castillo        |
| IP2666 Kan                   | Wild type <i>Yptb</i> IP2666c pBI <sup>+</sup> <i>yopH</i> (NdeI): Kan <sup>R</sup>      | (Fisher et al., 2007)   |
| IP2666 Δ <i>yopH</i>         | Deletion of <i>yopH</i>                                                                  | (Fisher et al., 2007)   |
| IP2666 Δ5                    | Deletion of <i>yopH</i> , <i>yopE</i> , <i>yopJ</i> , <i>yopM</i> , <i>yopO</i>          | (Auerbuch et al., 2009) |
| IP2666 Δ5 + pBAD33           | Deletion of <i>yopH</i> , <i>yopE</i> , <i>yopJ</i> , <i>yopM</i> , <i>yopO</i> + pBAD33 | This work               |
| IP2666 Δ5 + pYopH            | Deletion of <i>yopH</i> , <i>yopE</i> , <i>yopJ</i> , <i>yopM</i> , <i>yopO</i> + pYopH  | This work               |
| IP2666 Δ5 + pYopE            | Deletion of <i>yopH</i> , <i>yopE</i> , <i>yopJ</i> , <i>yopM</i> , <i>yopO</i> + pYopE  | This work               |
| Plasmids                     |                                                                                          |                         |
| pSR475-E TEM                 | YopE-TEM1; Kan <sup>R</sup>                                                              | (Harmon et al., 2010)   |
| pBAD33                       | Arabinose-inducible expression vector; Cm <sup>R</sup>                                   | (Guzman et al., 1995)   |
| pYopH                        | Expressed <i>yopH</i> from pBAD33; Cm <sup>R</sup>                                       | Lauren Logsdon          |
| pYopE                        | Expressed <i>yopE</i> from pBAD33; Cm <sup>R</sup>                                       | Lauren Logsdon          |

\*Table S1 related to Figures 1-6

## **Supplemental Experimental Methods**

### **Cytokine detection in PMNs isolated from spleens of infected mice**

Groups of five mice were infected IV with either WT-ETEM or *ΔyopH*-ETEM. Five days p.i, spleens were collected and TEM<sup>pos</sup>Gr1<sup>+</sup>CD11b<sup>+</sup> and TEM<sup>neg</sup> Gr1<sup>+</sup>CD11b<sup>+</sup> cells (both neutrophils and iMo) were isolated as described above with the addition of 3.0 μg/ml brefeldin A to enhance detection of intracellular cytokines. TEM<sup>pos</sup>Gr1<sup>+</sup>CD11b<sup>+</sup> and TEM<sup>neg</sup> Gr1<sup>+</sup>CD11b<sup>+</sup> cells were lysed with a eukaryotic lysis buffer (Durand et al., 2010) for 30 minutes at 4°C in the presence of protease inhibitor cocktail (Sigma P8340), 100μM sodium orthovanadate and 20mM sodium fluoride. Cytokines were isolated from clarified supernatants using the BD™ Cytometric Bead Array following manufacturer's instructions and analyzed in a FACS LSR II. Statistical significance was calculated by one-way ANOVA followed by Tukey's multiple comparison post test.

### **Gentamicin protection assay from total splenocytes**

Single cell suspensions of spleens from animals intravenously infected for 4 days with 1,000 CFUs of WT-ETEM, 10,000 CFUs of *ΔyopH*-ETEM or 5,000 CFUs of *ΔyopE*-ETEM were prepared by gently dissociating the tissue through 70 μm nylon mesh. An aliquot was plated for total CFUs before 100 μg/ml of gentamicin was added. After 2 hour at 37°C in 5% CO<sub>2</sub>, the cells were washed three times with PBS, lysed with 100 μl of 1% Triton-X-100 for 15 min followed by the addition of 900 μl PBS, then lysates diluted and plated for CFUs to determine the number of total and gentamicin-protected bacteria. The percentage of gentamicin-protected bacteria was determined by dividing the number of



gentamicin-protected CFU by the total number of CFU and multiplying that by 100.

### **Gentamicin protection assay of sorted TEM<sup>pos</sup> and TEM<sup>neg</sup> splenocytes**

Single-cell suspensions of spleens from mice intravenously infected for 5 days with 1,000 CFUs of WT-E TEM were prepared by gently dissociating the tissue through 70 µm nylon mesh. Samples were assayed for CFUs before 100 µg/ml of gentamicin was added. Splenocytes were labeled for 30 minutes in the dark at room temperature in media containing 1 µg/ml CCF4-AM (Invitrogen), 1.5mM probenecid (Sigma) and 100 µg/ml gentamicin.  $1 \times 10^5$  TEM<sup>pos</sup> and TEM<sup>neg</sup> cells were collected by FACS, washed, and lysed with 100 µl of 1% Triton-X-100 for 15 min followed by the addition of 900 µl PBS, and then the lysates were plated for CFUs to determine the number of gentamicin-protected bacteria.

### **References**

- Auerbuch, V., D.T. Golenbock, and R.R. Isberg. 2009. Innate immune recognition of *Yersinia pseudotuberculosis* type III secretion. *PLoS pathogens* 5:e1000686.
- Durand, E.A., F.J. Maldonado-Arocho, C. Castillo, R.L. Walsh, and J. Meccas. 2010. The presence of professional phagocytes dictates the number of host cells targeted for Yop translocation during infection. *Cell Microbiol* 12:1064-1082.
- Fisher, M.L., C. Castillo, and J. Meccas. 2007. Intranasal inoculation of mice with *Yersinia pseudotuberculosis* causes a lethal lung infection that is dependent on *Yersinia* outer proteins and PhoP. *Infection and immunity* 75:429-442.
- Guzman, L.M., D. Belin, M.J. Carson, and J. Beckwith. 1995. Tight regulation, modulation, and high-level expression by vectors containing the arabinose PBAD promoter. *Journal of bacteriology* 177:4121-4130.
- Harmon, D.E., A.J. Davis, C. Castillo, and J. Meccas. 2010. Identification and characterization of small-molecule inhibitors of Yop translocation in *Yersinia pseudotuberculosis*. *Antimicrob Agents Chemother* 54:3241-3254.

Ivanov, M.I., J.A. Stuckey, H.L. Schubert, M.A. Saper, and J.B. Bliska. 2005. Two substrate-targeting sites in the *Yersinia* protein tyrosine phosphatase co-operate to promote bacterial virulence. *Molecular microbiology* 55:1346-1356.

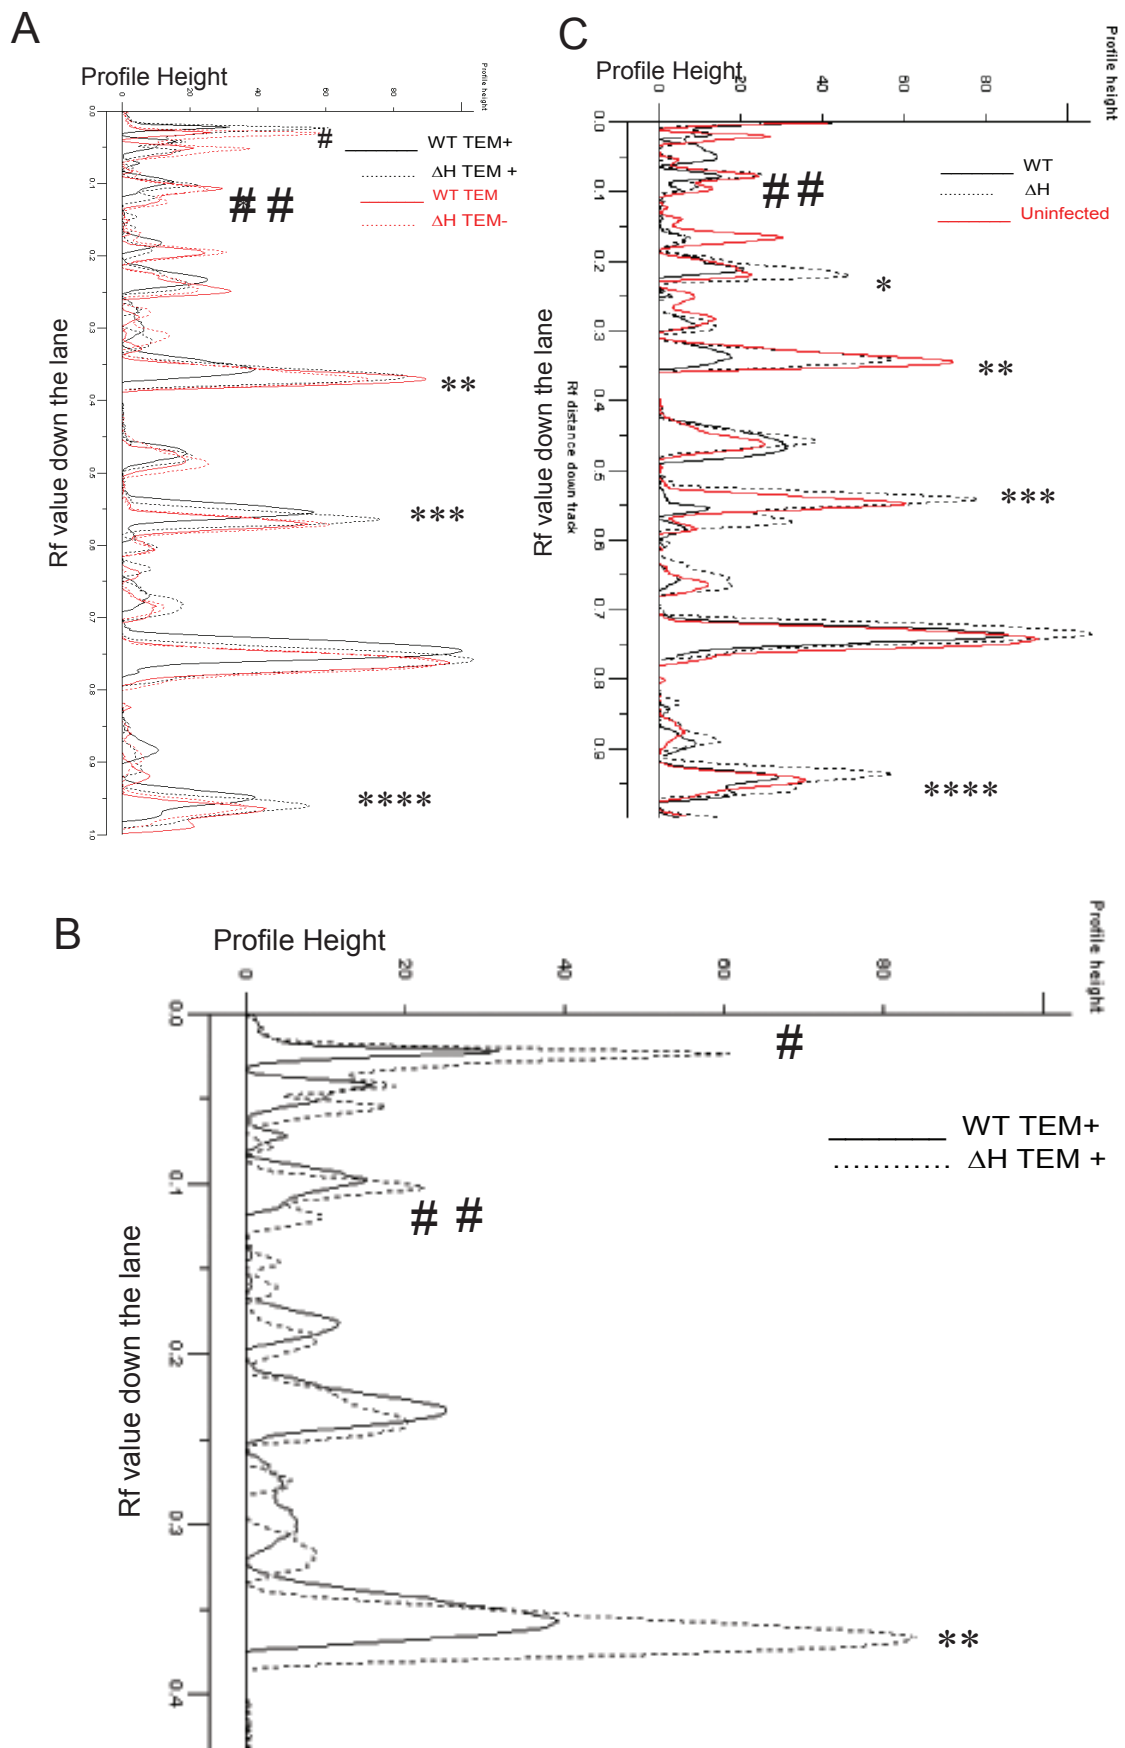

Figure S2

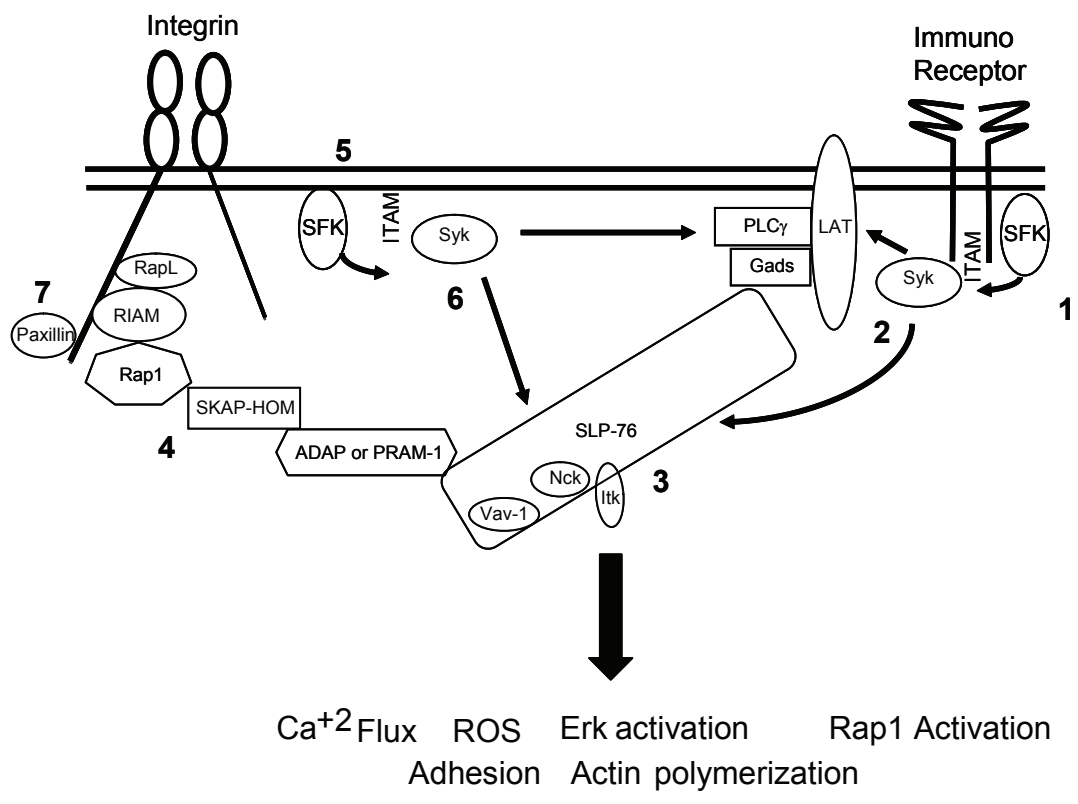

Figure S3

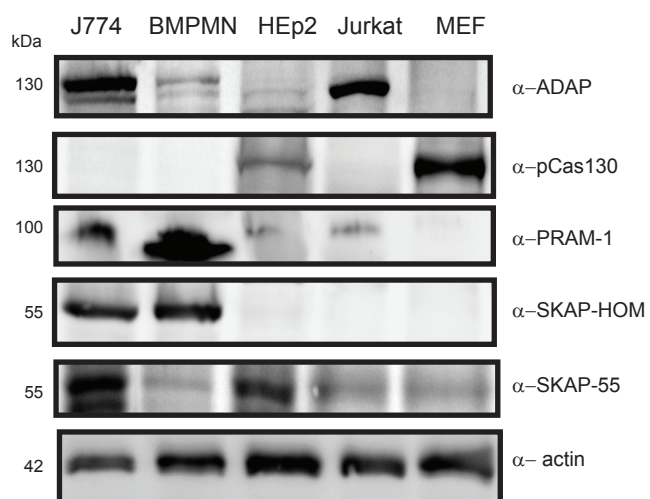

Figure S4

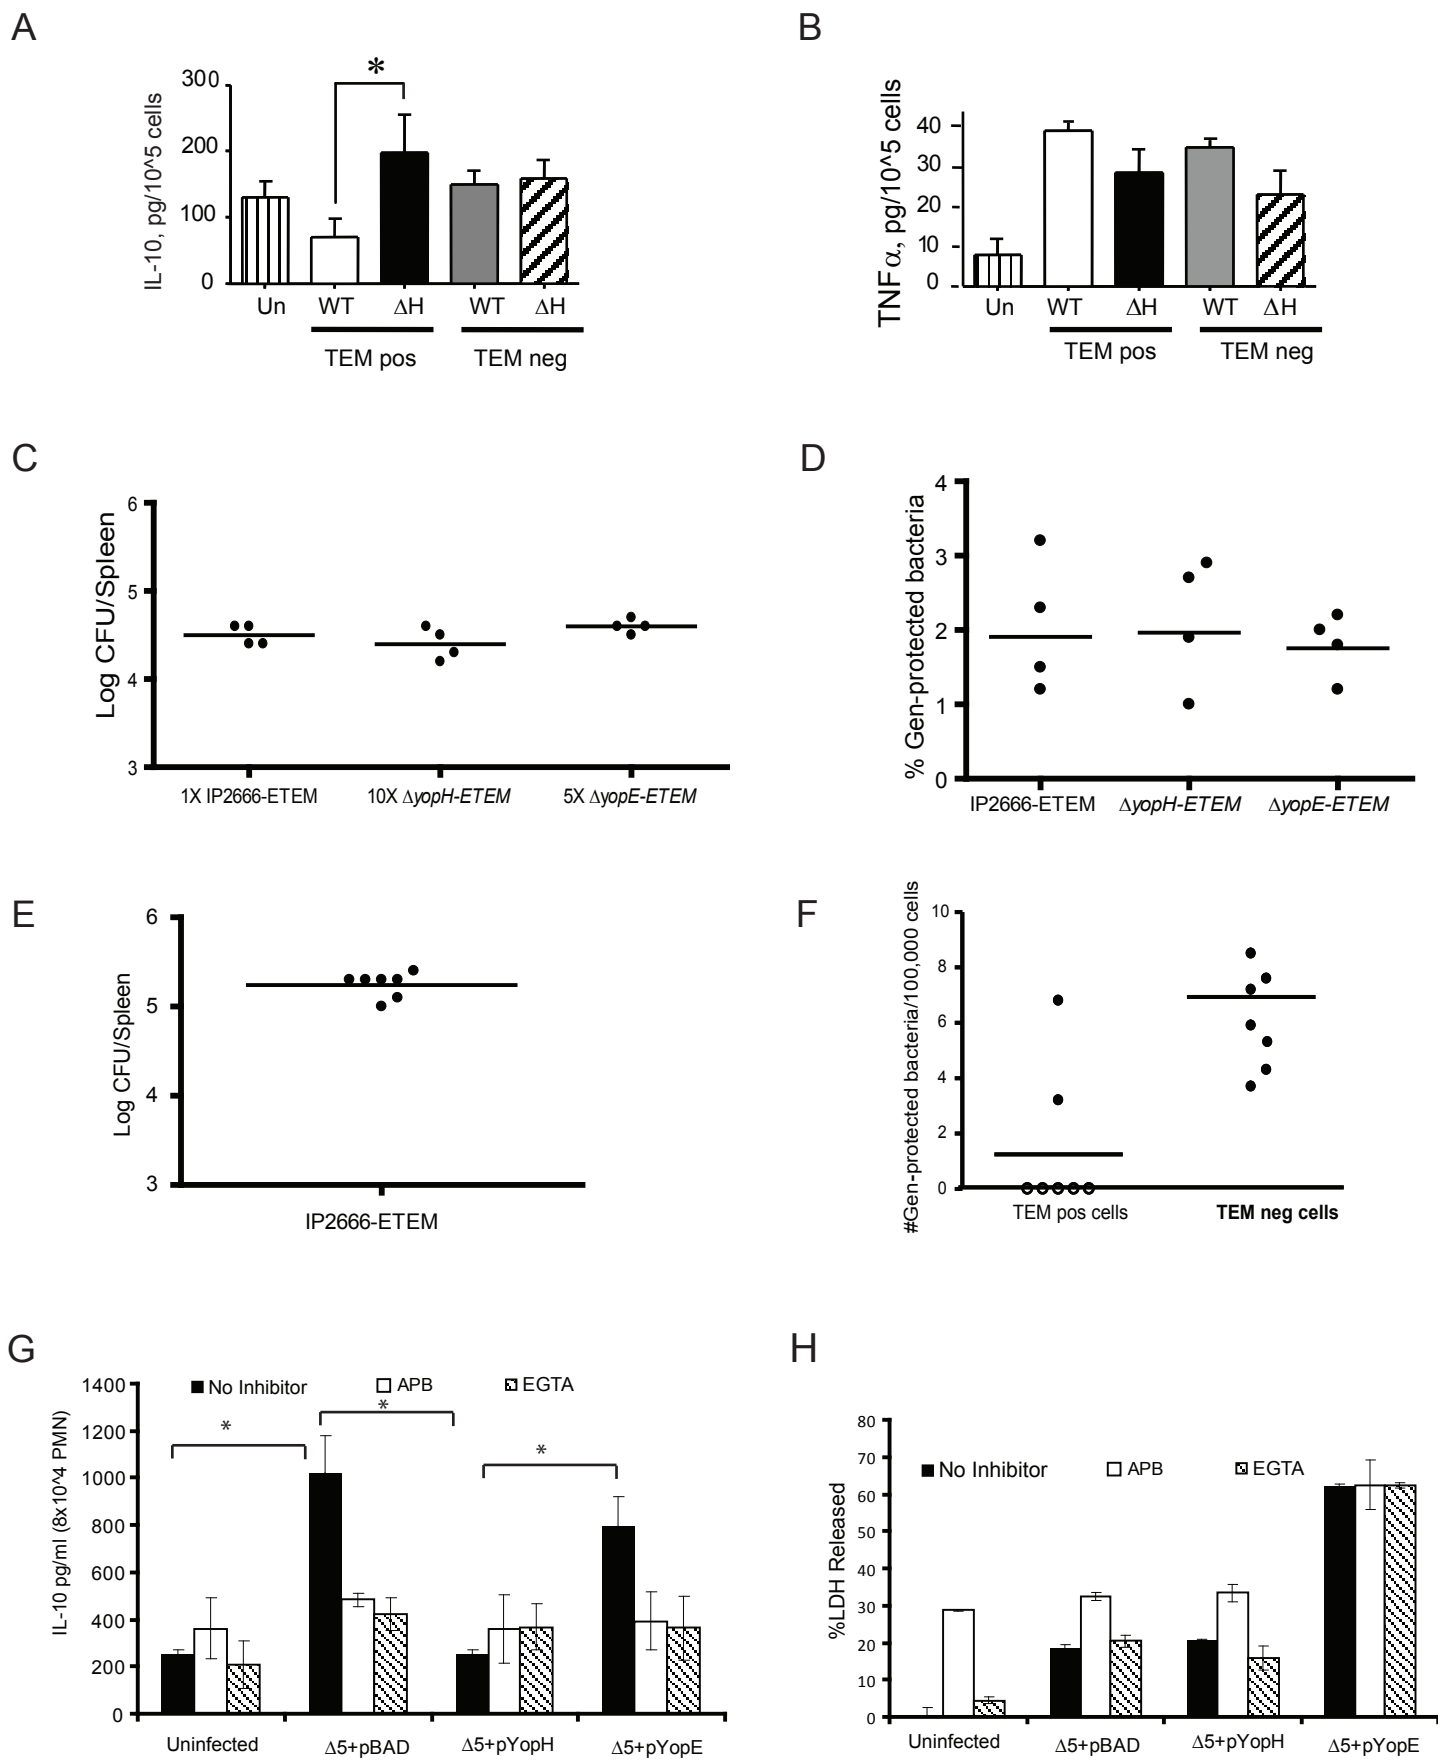

Supplement: NIHMS521822-supplement-01.pdf [file NIHMS521822-supplement-01.pdf]
